# Supplementary material
Source: Springer Nature journal article supplement (https://www.springermedizin.de/resource/supplementary/12985_2010_1082_MOESM1_ESM.pdf/9609104)
Supplement: MOESM1 [file 9609104]

Polyadenylation  
signal

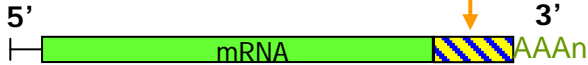

+ve sense

Identified by  
RNA Ligation  
(5' RACE  
didn't work)

Identified by  
3' RACE PCR

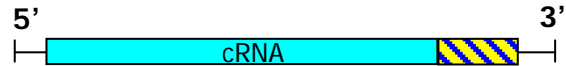

+ve sense

Identified by  
3' RACE PCR

Identified by  
1) 5' RACE PCR  
2) RNA Ligation  
(segments 2&3)

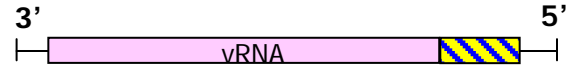

-ve sense
